# Supplementary material for: Organ Dysfunction in Patients with Advanced Melanoma Treated with Immune Checkpoint Inhibitors
Source: PubMed Central journal article supplement — Oncologist. 2020 Oct 3;25(11):e1753–62. doi: 10.1634/theoncologist.2020-0055 (PMC7648349; doi:10.1634/theoncologist.2020-0055), 2020-10-03
Supplement: ONCO-25-e1753-s001.pdf [file ONCO-25-e1753-s001.pdf]

Supplemental Tables for:  
Organ dysfunction in advanced melanoma patients treated with immune checkpoint inhibitors  
Susan Spillane et al.

**Table S1:** Multivariable hazard ratios (HR) and 95% confidence intervals (CI) of associations with rwTTD (top) or OS (bottom) for: baseline renal function, patient characteristics (age and stage at diagnosis), treatment regimen (dichotomized as monotherapy/combination therapy)†,

|                           |                     | Adjusted‡ HR (95% CI) | p-value |
|---------------------------|---------------------|-----------------------|---------|
| <b>rwTTD</b>              |                     |                       |         |
| <b>Renal function</b>     | Normal              | Ref                   |         |
|                           | Moderate/severe     | 1.4 (1.0-2.0)         | 0.044   |
| <b>Age</b>                | <70 years           | Ref                   |         |
|                           | 70 years+           | 0.9 (0.8-1.1)         | 0.286   |
| <b>Stage at diagnosis</b> | III/IV              | Ref                   |         |
|                           | 0/I/II              | 0.9 (0.8-1.0)         | 0.014   |
|                           | Unknown             | 1.0 (0.9-1.1)         | 0.930   |
| <b>Treatment regimen†</b> | Monotherapy         | Ref                   | -       |
|                           | Combination therapy | 0.8 (0.7-0.9)         | <0.001  |
| <b>OS</b>                 |                     |                       |         |
| <b>Renal function</b>     | Normal              | Ref                   |         |
|                           | Moderate/severe     | 2.3 (1.6-3.2)         | <0.001  |
| <b>Age</b>                | <70 years           | Ref                   |         |
|                           | 70 years+           | 1.3 (1.1-1.5)         | <0.001  |
| <b>Stage at diagnosis</b> | III/IV              | Ref                   | -       |
|                           | 0/I/II              | 0.8 (0.6-0.9)         | 0.001   |
|                           | Unknown             | 1.0 (0.9-1.2)         | 0.687   |
| <b>Treatment regimen†</b> | Monotherapy         | Ref                   | -       |
|                           | Combination therapy | 0.9 (0.8-1.1)         | 0.475   |

†Note: Patients may have received second-line ICI or other relevant treatment subsequent to treatment start and prior to outcome measurement.

‡Models adjusted for all variables listed

Supplemental Tables for:  
Organ dysfunction in advanced melanoma patients treated with immune checkpoint inhibitors  
Susan Spillane et al.

**Table S2:** Multivariable hazard ratios (HR) and 95% confidence intervals (CI) of associations with rwTTD (top) or OS (bottom) for: baseline hepatic function, patient characteristics (age and stage at diagnosis), treatment regimen (dichotomized as monotherapy/combination therapy)†,

|                           |                     | Adjusted‡ HR (95% CI) | p-value |
|---------------------------|---------------------|-----------------------|---------|
| <b>rwTTD</b>              |                     |                       |         |
| <b>Hepatic function</b>   | Normal              | Ref                   |         |
|                           | Moderate/severe     | 1.6 (1.2-2.3)         | 0.006   |
| <b>Age</b>                | <70 years           | Ref                   |         |
|                           | 70 years+           | 1.0 (0.9-1.1)         | 0.813   |
| <b>Stage at diagnosis</b> | III/IV              | Ref                   |         |
|                           | 0/I/II              | 0.9 (0.8-1.0)         | 0.054   |
|                           | Unknown             | 1.0 (0.9-1.2)         | 0.972   |
| <b>Treatment regimen†</b> | Monotherapy         | Ref                   | -       |
|                           | Combination therapy | 0.8 (0.7-0.9)         | <0.001  |
| <b>OS</b>                 |                     |                       |         |
| <b>Hepatic function</b>   | Normal              | Ref                   |         |
|                           | Moderate/severe     | 1.9 (1.3-2.9)         | 0.001   |
| <b>Age</b>                | <70 years           | Ref                   |         |
|                           | 70 years+           | 1.4 (1.2-1.7)         | <0.001  |
| <b>Stage at diagnosis</b> | III/IV              | Ref                   | -       |
|                           | 0/I/II              | 0.7 (0.6-0.9)         | 0.002   |
|                           | Unknown             | 1.0 (0.9-1.2)         | 0.787   |
| <b>Treatment regimen†</b> | Monotherapy         | Ref                   | -       |
|                           | Combination therapy | 0.9 (0.8-1.1)         | 0.502   |

†Note: Patients may have received second-line ICI or other relevant treatment subsequent to treatment start and prior to outcome measurement.

‡Models adjusted for all variables listed

Supplemental Tables for:  
Organ dysfunction in advanced melanoma patients treated with immune checkpoint inhibitors  
Susan Spillane et al.

**Table S3: Multivariable odds ratios (OR) and 95% confidence intervals (CI) for associations between patient characteristics, treatment regimen, and risk of emergent (A) renal dysfunction; (B) hepatic dysfunction in first 90 days following ICI treatment initiation.\***

|                                                              |                           | Total | Events (% total) | Adjusted OR† | (95% CI)     | p-value |
|--------------------------------------------------------------|---------------------------|-------|------------------|--------------|--------------|---------|
| <b>Emergent renal dysfunction (82 events/1,778 total)</b>    |                           |       |                  |              |              |         |
| <b>Age</b>                                                   | <70 years                 | 935   | 36 (3.9%)        | <i>Ref</i>   |              |         |
|                                                              | 70 years+                 | 843   | 46 (5.5%)        | 1.71         | (1.07, 2.74) | 0.027   |
| <b>Sex</b>                                                   | Female                    | 569   | 16 (2.8%)        | <i>Ref</i>   |              |         |
|                                                              | Male                      | 1,209 | 66 (5.5%)        | 1.92         | (1.17, 3.15) | 0.012   |
| <b>Stage at diagnosis</b>                                    | III/IV                    | 930   | 41 (4.4%)        | <i>Ref</i>   | -            |         |
|                                                              | 0/I/II                    | 486   | 25 (5.1%)        | 1.13         | (0.74, 1.75) | 0.569   |
|                                                              | Unknown                   | 362   | 16 (4.4%)        | 1.00         | (0.65, 1.55) | 0.999   |
| <b>Practice type</b>                                         | Academic practice         | 292   | 14 (4.8%)        | <i>Ref</i>   |              |         |
|                                                              | Community                 | 1,486 | 68 (4.6%)        | 0.79         | (0.32, 1.97) | 0.621   |
| <b>Treatment regimen† (first regimen received)</b>           | ipilimumab monotherapy    | 558   | 24 (4.3%)        | <i>Ref</i>   | -            | -       |
|                                                              | ipilimumab + nivolumab    | 376   | 29 (7.7%)        | 2.07         | (1.10, 3.88) | 0.026   |
|                                                              | nivolumab monotherapy     | 338   | 15 (4.4%)        | 0.96         | (0.51, 1.82) | 0.905   |
|                                                              | pembrolizumab monotherapy | 506   | 14 (2.8%)        | 0.57         | (0.29, 1.14) | 0.114   |
| <b>Emergent hepatic dysfunction (119 events/1,616 total)</b> |                           |       |                  |              |              |         |
| <b>Age</b>                                                   | <70 years                 | 831   | 79 (9.5%)        | <i>Ref</i>   |              |         |
|                                                              | 70 years+                 | 785   | 40 (5.1%)        | 0.63         | (0.41, 0.97) | 0.040   |
| <b>Sex</b>                                                   | Female                    | 503   | 39 (7.8%)        | <i>Ref</i>   |              |         |
|                                                              | Male                      | 1,113 | 80 (7.2%)        | 0.96         | (0.66, 1.40) | 0.824   |
| <b>Stage at diagnosis</b>                                    | III/IV                    | 836   | 68 (8.1%)        | <i>Ref</i>   | -            | -       |
|                                                              | 0/I/II                    | 435   | 32 (7.4%)        | 0.95         | (0.63, 0.69) | 0.824   |
|                                                              | Unknown                   | 345   | 19 (5.5%)        | 0.68         | (0.42, 1.12) | 0.136   |
| <b>Practice type</b>                                         | Academic practice         | 165   | 10 (6.1%)        | <i>Ref</i>   |              |         |
|                                                              | Community                 | 1,451 | 109 (7.5%)       | 1.08         | (0.58, 1.98) | 0.816   |
| <b>Treatment regimen† (first regimen received)</b>           | ipilimumab monotherapy    | 512   | 39 (7.6%)        | <i>Ref</i>   | -            | -       |
|                                                              | ipilimumab + nivolumab    | 328   | 44 (13.4%)       | 1.71         | (1.12, 2.60) | 0.014   |
|                                                              | nivolumab monotherapy     | 317   | 19 (6.0%)        | 0.81         | (0.44, 1.51) | 0.515   |
|                                                              | pembrolizumab monotherapy | 459   | 17 (3.7%)        | 0.49         | (0.29, 0.84) | 0.011   |

†Note: Patients may have received second-line ICI or other relevant treatment subsequent to treatment start and prior to identification of emergent dysfunction. ‡Models adjusted for all variables listed

Supplemental Tables for:  
Organ dysfunction in advanced melanoma patients treated with immune checkpoint inhibitors  
Susan Spillane et al.

**Table S4: Comparison of characteristics and outcomes for patients with lab values available at baseline, versus unavailable for each of: (A) renal function; (B) hepatic function.**

|                                         | A. Renal function information, baseline lab |                      |                 | B. Hepatic function information, baseline lab |                      |                 |
|-----------------------------------------|---------------------------------------------|----------------------|-----------------|-----------------------------------------------|----------------------|-----------------|
|                                         | Unavailable<br>N=523                        | Available<br>N=1,884 | <i>p</i> -value | Unavailable<br>N=690                          | Available<br>N=1,717 | <i>p</i> -value |
| <b>Demographic characteristics</b>      |                                             |                      |                 |                                               |                      |                 |
| Sex, n (%):                             |                                             |                      | 0.877           |                                               |                      | 0.282           |
| Female                                  | 166 (31.7)                                  | 589 (31.3)           |                 | 228 (33.0%)                                   | 527 (30.7)           |                 |
| Male                                    | 357 (68.3)                                  | 1,295 (68.7)         |                 | 462 (67.0%)                                   | 1,190 (69.3)         |                 |
| Median age† (years), [IQR]              | 71.0 (59.0, 78.0)                           | 69.0 (59.0, 78.0)    | 0.224           | 70.0 (59.0, 78.0)                             | 69.0 (59.0, 78.0)    | 0.525           |
| <b>Clinical characteristics, n (%)</b>  |                                             |                      |                 |                                               |                      |                 |
| Stage at initial diagnosis:             |                                             |                      | 0.018           |                                               |                      | 0.665           |
| Stage 0                                 | 1 (0.2)                                     | 8 (0.4)              |                 | 1 (0.1)                                       | 8 (0.5)              |                 |
| Stage I                                 | 35 (6.7)                                    | 155 (8.2)            |                 | 53 (7.7)                                      | 137 (8.0)            |                 |
| Stage II                                | 85 (16.3)                                   | 353 (18.7)           |                 | 117 (17.0)                                    | 321 (18.7)           |                 |
| Stage III                               | 94 (18.0)                                   | 423 (22.5)           |                 | 146 (21.2)                                    | 371 (21.6)           |                 |
| Stage IV                                | 173 (33.1)                                  | 555 (29.5)           |                 | 213 (30.9)                                    | 515 (30.0)           |                 |
| Unknown                                 | 135 (25.8)                                  | 390 (20.7)           |                 | 160 (23.2)                                    | 365 (21.3)           |                 |
| ECOG PS†:                               |                                             |                      | 0.167           |                                               |                      | <0.001          |
| 0                                       | 130 (24.9)                                  | 460 (24.4)           |                 | 141 (20.4)                                    | 449 (26.2)           |                 |
| 1                                       | 95 (18.2)                                   | 381 (20.2)           |                 | 111 (16.1)                                    | 365 (21.3)           |                 |
| 2+                                      | 61 (11.7)                                   | 163 (8.7)            |                 | 65 (9.4)                                      | 159 (9.3)            |                 |
| Missing                                 | 237 (45.3)                                  | 880 (46.7)           |                 | 373 (54.1)                                    | 744 (43.3)           |                 |
| LDH test result‡:                       |                                             |                      | <0.001          |                                               |                      | <0.001          |
| Abnormal LDH test result                | 45 (8.6)                                    | 390 (20.7)           |                 | 78 (11.3)                                     | 357 (20.8)           |                 |
| No LDH test                             | 426 (81.5)                                  | 750 (39.8)           |                 | 467 (67.7)                                    | 709 (41.3)           |                 |
| Normal LDH test result                  | 50 (9.6)                                    | 728 (38.6)           |                 | 143 (20.7)                                    | 635 (37.0)           |                 |
| Not elevated LDH                        | 2 (0.4)                                     | 16 (0.8)             |                 | 2 (0.3)                                       | 16 (0.9)             |                 |
| <b>Tumor characteristics, n (%)</b>     |                                             |                      |                 |                                               |                      |                 |
| BRAF:                                   |                                             |                      | <0.001          |                                               |                      | <0.001          |
| Mutation -                              | 268 (51.2)                                  | 1,072 (56.9)         |                 | 357 (51.7)                                    | 983 (57.3)           |                 |
| Mutation +                              | 117 (22.4)                                  | 480 (25.5)           |                 | 160 (23.2)                                    | 437 (25.5)           |                 |
| Not tested pre treatment                | 120 (22.9)                                  | 275 (14.6)           |                 | 156 (22.6)                                    | 239 (13.9)           |                 |
| Unknown/indeterminate                   | 18 (3.4)                                    | 57 (3.0)             |                 | 17 (2.5)                                      | 58 (3.4)             |                 |
| <b>Treatment characteristics, n (%)</b> |                                             |                      |                 |                                               |                      |                 |
| Practice type:                          |                                             |                      | <0.001          |                                               |                      | <0.001          |
| Academic                                | 11 (2.1)                                    | 302 (16.0)           |                 | 143 (20.7)                                    | 170 (9.9)            |                 |
| Community                               | 512 (96.7)                                  | 1,582 (84.0%)        |                 | 547 (79.3)                                    | 1547 (90.1%)         |                 |
| Regimen:                                |                                             |                      | 0.029           |                                               |                      | 0.084           |
| ipilimumab                              | 151 (28.9)                                  | 590 (31.3)           |                 | 199 (28.8)                                    | 542 (31.6)           |                 |

Supplemental Tables for:  
Organ dysfunction in advanced melanoma patients treated with immune checkpoint inhibitors  
Susan Spillane et al.

|                                          |                   |                 |        |                   |                 |        |
|------------------------------------------|-------------------|-----------------|--------|-------------------|-----------------|--------|
| ipilimumab + nivolumab                   | 105 (20.1)        | 389 (20.6)      |        | 143 (20.7)        | 351 (20.4)      |        |
| nivolumab                                | 135 (25.8)        | 374 (19.9)      |        | 168 (24.3)        | 341 (19.9)      |        |
| pembrolizumab                            | 132 (25.2)        | 531 (28.2)      |        | 180 (26.1)        | 483 (28.1)      |        |
| <b>Time to treatment discontinuation</b> |                   |                 |        |                   |                 |        |
| Median, months (95% CI)                  | 2.5 (2.3, 2.8)    | 2.1 (1.6, 3.2)  | 0.033  | 2.5 (2.3, 2.8)    | 2.1 (1.6, 3.2)  | 0.033  |
| <b>Overall survival</b>                  |                   |                 |        |                   |                 |        |
| Median months (95% CI)                   | 22.1 (19.9, 25.5) | 8.2 (4.2, 12.9) | <0.001 | 22.1 (19.9, 25.5) | 8.2 (4.2, 12.9) | <0.001 |

ECOG PS: Eastern Cooperative Oncology Group Performance Status

†At index date, defined as first-line therapy start date

§LDH: Lactate dehydrogenase
